# Supplementary material for: Chemical Compositions and Antioxidant Activities of Essential Oils, and Their Combinations, Obtained from Flavedo By-Product of Seven Cultivars of Sicilian Citrus aurantium L
Source: MDPI journal article supplement (doi:10.3390/molecules27051580), 2022-02-27
Supplement: s1 [file s1]

## Supplementary material

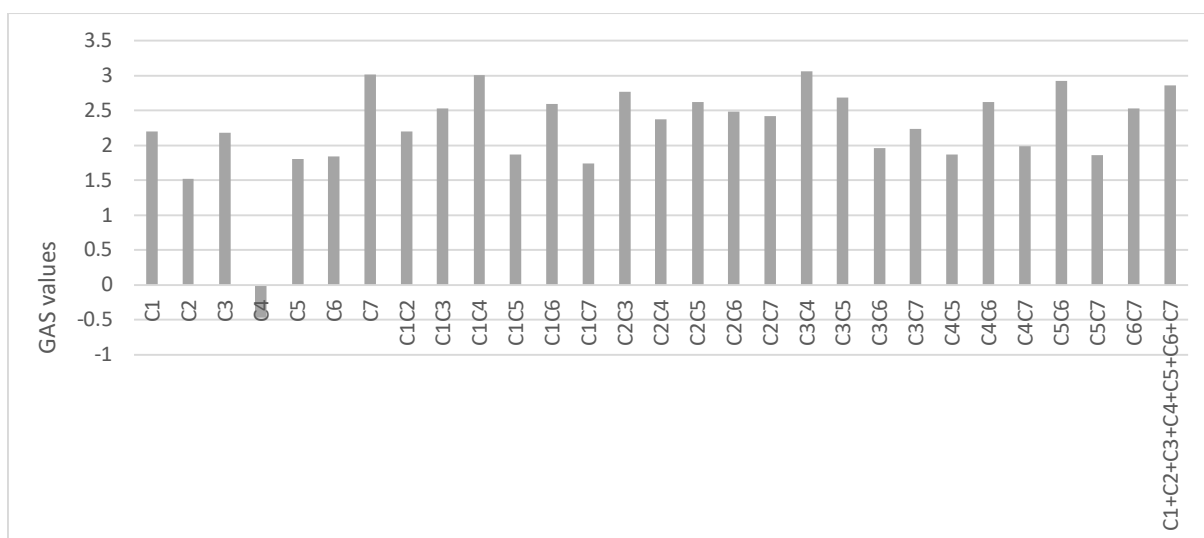

**Figure S1.** Comparative Global Antioxidant Score (GAS) of *C. aurantium* cultivars EO and their combinations

**Table S1.** Composition (%) of mixes of the essential oils.

| Compounds                  | C1C2  | C1C3  | C1C4  | C1C5  | C1C6  | C1C7  | C2C3  | C2C4  | C2C5  | C2C6  | C2C7  |
|----------------------------|-------|-------|-------|-------|-------|-------|-------|-------|-------|-------|-------|
| $\alpha$ -Pinene           | 2.78  | 1.42  | 2.84  | 2.33  | 3.00  | 2.19  | 1.23  | 2.58  | 2.08  | 2.71  | 2.00  |
| $\beta$ -Pinene            | 1.72  | 2.13  | 3.00  | 1.70  | 2.98  | 2.42  | 0.53  | 1.41  | -     | 1.44  | 0.83  |
| $\beta$ -Myrcene           | 5.14  | 2.34  | 2.39  | 4.18  | 1.89  | 3.29  | 4.76  | 4.81  | 6.66  | 4.32  | 5.88  |
| <i>n</i> -Octanal          | 1.68  | 1.93  | 2.53  | 1.95  | 1.88  | 1.85  | -     | 0.66  | -     | -     | -     |
| D-Limonene                 | 79.02 | 55.40 | 76.75 | 80.15 | 76.82 | 83.21 | 60.01 | 78.50 | 81.74 | 78.44 | 84.83 |
| $\beta$ -cis-Ocimene       | 0.76  | -     | 0.54  | -     | 0.60  | 0.59  | 0.68  | 1.32  | 0.69  | 1.33  | 1.29  |
| <i>n</i> -Octanol          | -     | 0.84  | -     | -     | -     | -     | 0.83  | -     | -     | -     | -     |
| $\beta$ -Linalool          | 1.84  | 5.11  | 2.63  | 2.21  | 2.43  | 1.75  | 4.38  | 1.88  | 1.48  | 1.58  | 1.00  |
| $\alpha$ -Terpineol        | -     | 3.72  | 0.48  | 0.45  | 0.56  | -     | 3.56  | 0.57  | 0.50  | 0.55  | -     |
| <i>n</i> -Decanal          | 0.77  | 1.09  | 1.07  | 1.08  | 1.05  | 1.03  | -     | -     | -     | -     | -     |
| <i>cis</i> -Geraniol       | -     | 0.82  | -     | -     | -     | -     | 0.83  | -     | -     | -     | -     |
| $\beta$ -Citral            | -     | 0.97  | -     | -     | -     | -     | 1.01  | -     | -     | -     | -     |
| Bergamol                   | 0.68  | 3.28  | 1.80  | 0.80  | 2.12  | -     | 4.05  | 2.38  | 1.43  | 2.92  | 0.78  |
| <i>trans</i> -Geraniol     | -     | 1.74  | -     | -     | -     | -     | 1.72  | -     | -     | -     | -     |
| Neryl acetate              | -     | 3.31  | -     | -     | -     | -     | 3.29  | -     | -     | -     | -     |
| Geranyl acetate            | -     | 5.11  | 0.69  | -     | 0.68  | -     | 5.18  | 0.77  | -     | 0.70  | -     |
| <i>n</i> -Decyl acetate    | -     | 0.78  | -     | -     | -     | -     | 0.74  | -     | -     | -     | -     |
| Caryophyllene              | -     | 0.49  | -     | -     | -     | -     | 0.54  | -     | -     | -     | -     |
| Germacrene D               | -     | 1.65  | -     | -     | -     | -     | 1.63  | -     | -     | -     | -     |
| <i>trans</i> -Nerolidol    | -     | 2.25  | -     | -     | -     | -     | 2.25  | -     | -     | -     | -     |
| Monoterpene Hydrocarbons   | 89.42 | 61.29 | 85.52 | 88.36 | 85.29 | 91.70 | 67.21 | 88.62 | 91.17 | 88.24 | 94.83 |
| Oxygenated Monoterpenes    | 2.52  | 24.06 | 5.60  | 3.46  | 5.79  | 1.75  | 24.02 | 5.60  | 3.41  | 5.75  | 1.78  |
| Sesquiterpene Hydrocarbons | -     | 2.14  | -     | -     | -     | -     | 2.17  | -     | -     | -     | -     |
| Oxygenated Sesquiterpenes  | -     | 2.25  | -     | -     | -     | -     | 2.25  | -     | -     | -     | -     |
| Others                     | 2.45  | 4.64  | 3.60  | 3.03  | 2.93  | 2.88  | 1.57  | 0.66  | -     | -     | -     |

|                     |       |       |       |       |       |       |       |       |       |       |       |
|---------------------|-------|-------|-------|-------|-------|-------|-------|-------|-------|-------|-------|
| Total               | 94.39 | 94.38 | 94.72 | 94.85 | 94.01 | 96.33 | 97.22 | 94.88 | 94.58 | 93.99 | 96.61 |
| <i>continued...</i> |       |       |       |       |       |       |       |       |       |       |       |

| Compounds                     | C3C4  | C3C5  | C3C6  | C3C7  | C4C5  | C4C6  | C4C7  | C5C6  | C5C7  | C6C7  | mix*  |
|-------------------------------|-------|-------|-------|-------|-------|-------|-------|-------|-------|-------|-------|
| $\alpha$ -Pinene              | 1.44  | 0.91  | 2.89  | 0.78  | 2.20  | 2.98  | 2.16  | 2.30  | 1.64  | 2.18  | 2.11  |
| $\beta$ -Pinene               | 1.67  | 0.55  | 1.85  | 1.27  | 1.33  | 2.74  | 2.17  | 1.44  | 0.80  | 2.19  | 1.54  |
| $\beta$ -Myrcene              | 2.00  | 3.45  | 1.62  | 3.13  | 3.90  | 1.56  | 3.03  | 3.35  | 4.75  | 2.30  | 3.53  |
| <i>n</i> -Octanal             | 0.84  | -     | -     | -     | 0.53  | 0.67  | 0.68  | -     | -     | -     | 0.70  |
| D-Limonene                    | 54.32 | 58.04 | 54.99 | 62.17 | 80.01 | 76.13 | 81.47 | 79.23 | 85.78 | 82.56 | 72.99 |
| $\beta$ - <i>cis</i> -Ocimene | 0.48  | -     | 0.59  | 0.60  | 0.43  | 1.03  | 0.95  | 0.60  | 0.56  | 1.11  | 0.62  |
| <i>n</i> -Octanol             | 0.83  | 0.83  | 0.80  | 0.77  | -     | -     | -     | -     | -     | -     | 0.25  |
| $\beta$ -Linalool             | 5.23  | 4.35  | 4.99  | 4.19  | 2.19  | 2.50  | 1.87  | 2.08  | 1.32  | 1.58  | 2.65  |
| $\alpha$ -Terpineol           | 4.18  | 3.99  | 4.08  | 3.49  | 1.03  | 1.18  | 0.56  | 1.03  | 0.56  | 0.66  | 1.60  |
| <i>n</i> -Decanal             | -     | -     | -     | -     | -     | -     | -     | -     | -     | -     | 0.31  |
| <i>cis</i> -Geraniol          | 0.82  | 0.84  | 0.88  | 0.89  | -     | -     | -     | -     | -     | -     | 0.23  |
| $\beta$ -Citral               | 1.05  | 1.00  | 0.99  | 1.01  | -     | -     | -     | -     | -     | -     | 0.29  |
| Bergamol                      | 5.12  | 4.08  | 5.53  | 3.22  | 4.38  | 3.84  | 1.73  | 2.94  | 0.68  | 2.12  | 2.51  |
| <i>trans</i> -Geraniol        | 1.69  | 1.67  | 1.57  | 1.62  | -     | -     | -     | -     | -     | -     | 0.45  |
| Neryl acetate                 | 3.27  | 3.28  | 3.03  | 2.89  | -     | -     | -     | -     | -     | -     | 0.90  |
| Geranyl acetate               | 5.79  | 5.14  | 5.67  | 5.11  | 0.66  | 1.42  | 0.69  | 0.72  | -     | 0.69  | 1.74  |
| <i>n</i> -Decyl acetate       | 0.69  | 0.70  | 0.82  | 0.88  | -     | -     | -     | -     | -     | -     | 0.19  |
| Caryophyllene                 | 0.56  | 0.55  | 0.49  | 0.51  | -     | -     | -     | -     | -     | -     | 0.16  |
| Germacrene D                  | 1.62  | 1.58  | 1.84  | 1.87  | -     | -     | -     | -     | -     | -     | 0.55  |
| <i>trans</i> -Nerolidol       | 2.28  | 2.27  | 2.30  | 2.33  | -     | -     | -     | -     | -     | -     | 0.67  |
| Monoterpene Hydrocarbons      | 59.91 | 62.95 | 61.94 | 67.95 | 87.87 | 84.44 | 89.78 | 86.92 | 93.53 | 90.34 | 80.79 |
| Oxygenated Monoterpenes       | 27.15 | 24.35 | 26.74 | 22.42 | 8.26  | 8.94  | 4.85  | 6.77  | 2.56  | 5.05  | 10.37 |
| Sesquiterpene Hydrocarbons    | 2.18  | 2.13  | 2.33  | 2.38  | -     | -     | -     | -     | -     | -     | 0.71  |
| Oxygenated Sesquiterpenes     | 2.28  | 2.27  | 2.30  | 2.33  | -     | -     | -     | -     | -     | -     | 0.67  |
| Others                        | 2.36  | 1.53  | 1.62  | 1.65  | 0.53  | 0.67  | 0.68  | -     | -     | -     | 1.45  |
| Total                         | 93.88 | 93.23 | 94.93 | 96.73 | 96.66 | 94.05 | 95.31 | 93.69 | 96.09 | 95.39 | 93.99 |

\* Sample obtained by combination of equivolumetric quantity of C1, C2, C3, C4, C5, C6, and C7 EOs.

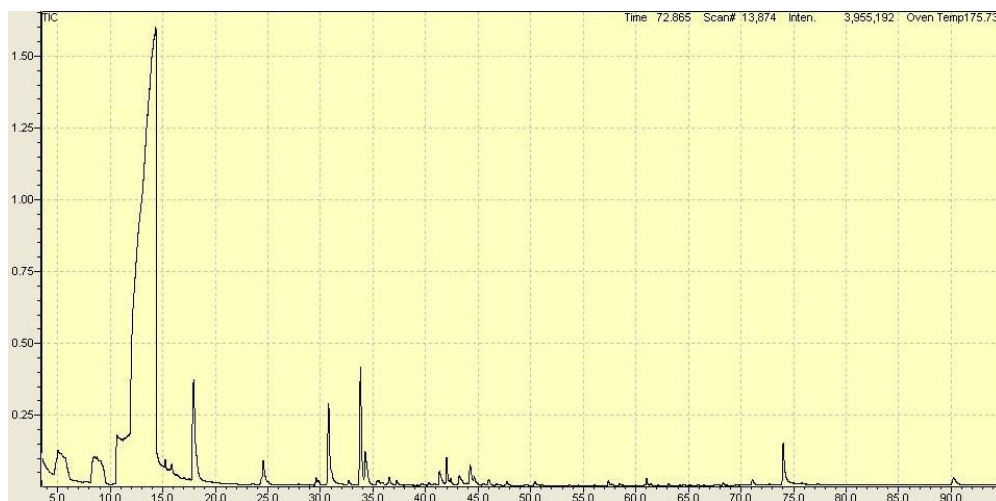

Figure S2. Chromatogram obtained by injection of *C. aurantium* 'Canaliculata' (C1) EO.

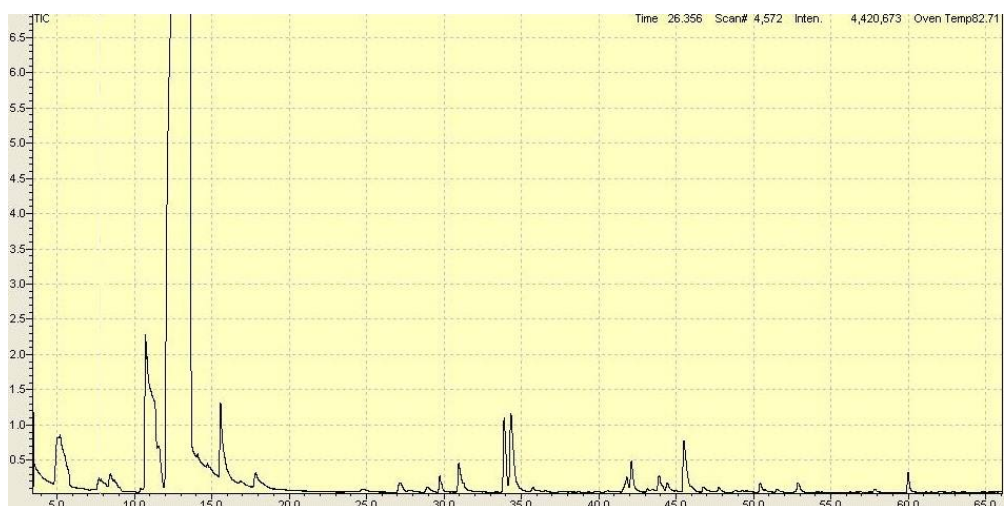

Figure S3. Chromatogram obtained by injection of *C. aurantium* 'Consolei' (C2) EO.

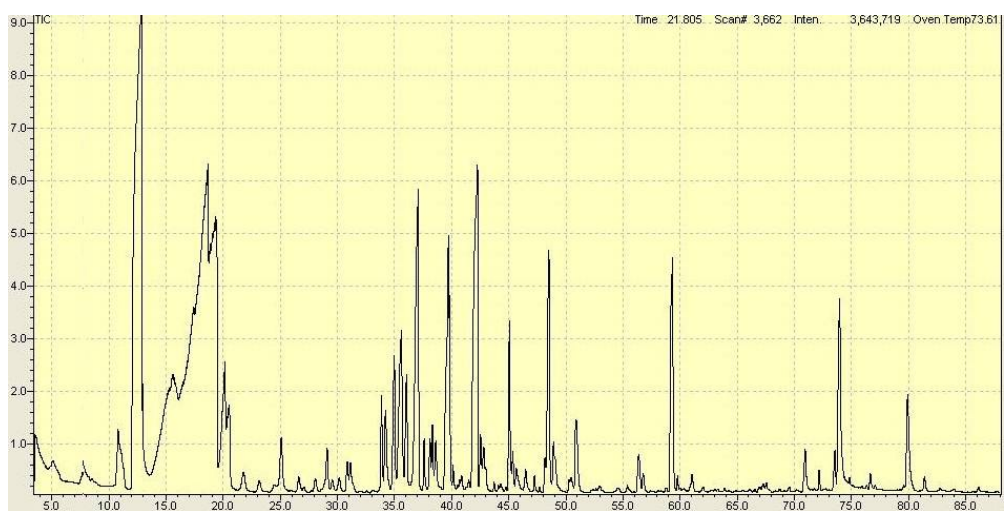

Figure S4. Chromatogram obtained by injection of *C. aurantium* 'Crispifolia' (C3) EO.

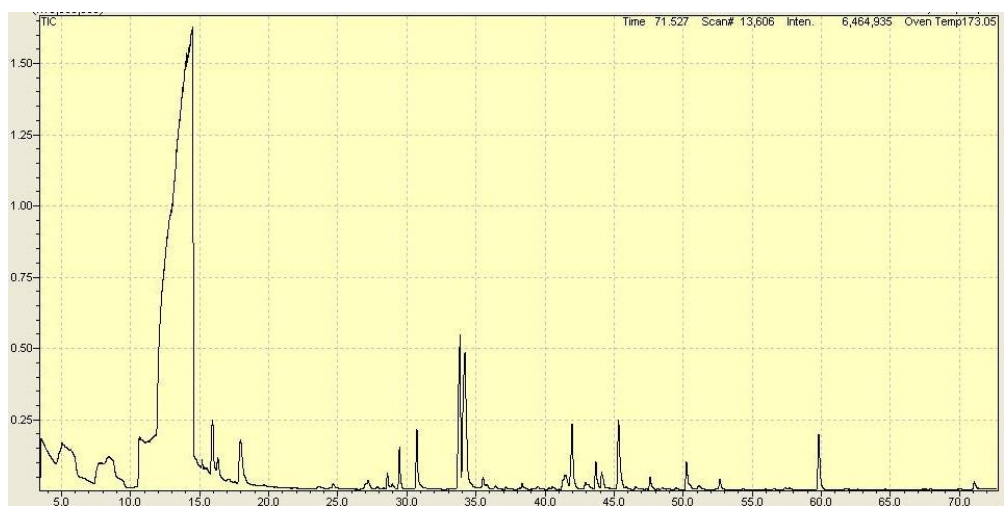

Figure S5. Chromatogram obtained by injection of *C. aurantium* 'Fasciata' (C4) EO.

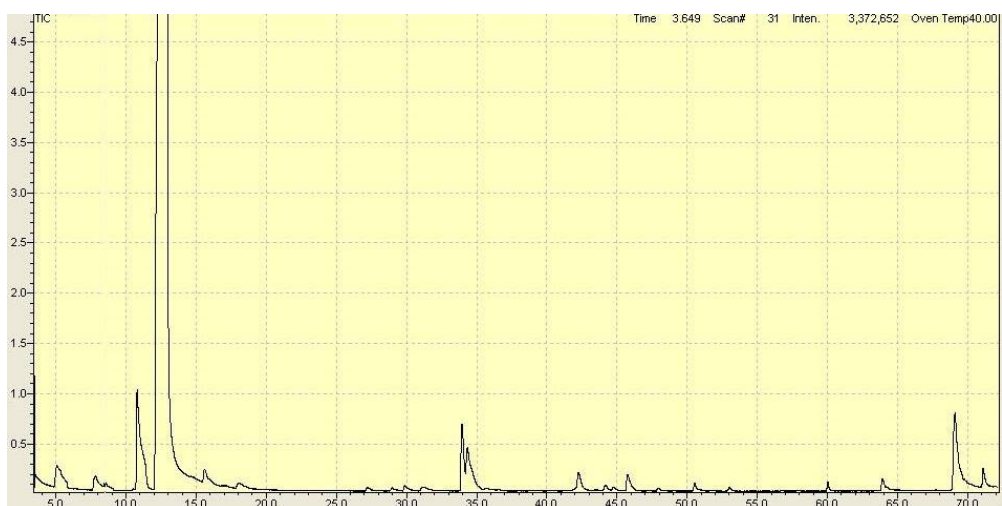

Figure S6. Chromatogram obtained by injection of *C. aurantium* 'Foetifera' (C5) EO.

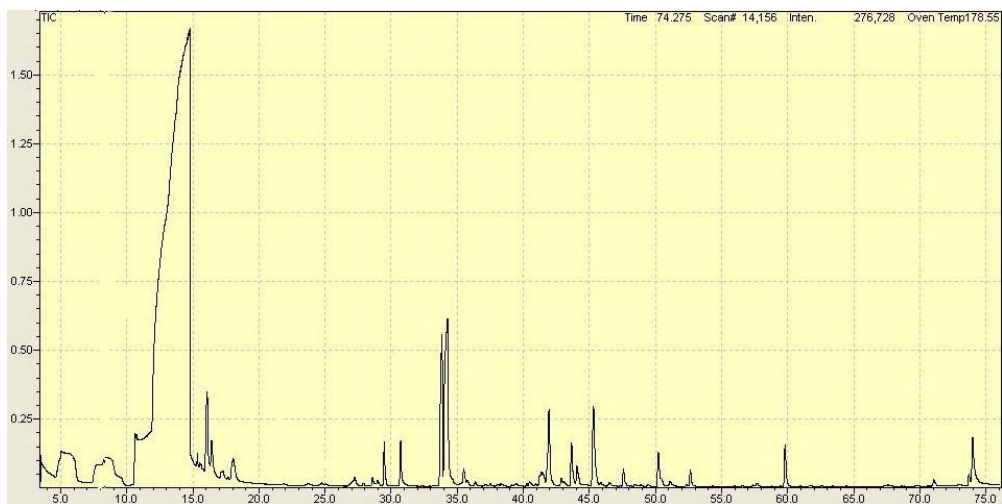

Figure S7. Chromatogram obtained by injection of *C. aurantium* 'Listata' (C6) EO.

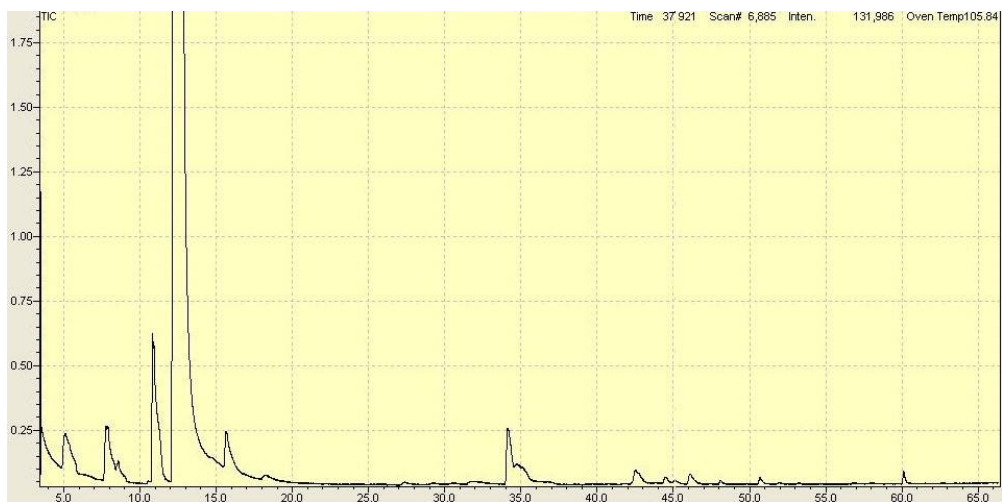

Figure S8. Chromatogram obtained by injection of *C. aurantium* 'Bizzaria' (C7) EO.
